# Supplementary material
Source: PubMed Central journal article supplement (PMC3660458)
Supplement: NIHMS462065-supplement-1.pdf [file NIHMS462065-supplement-1.pdf]

## Supplemental Figure

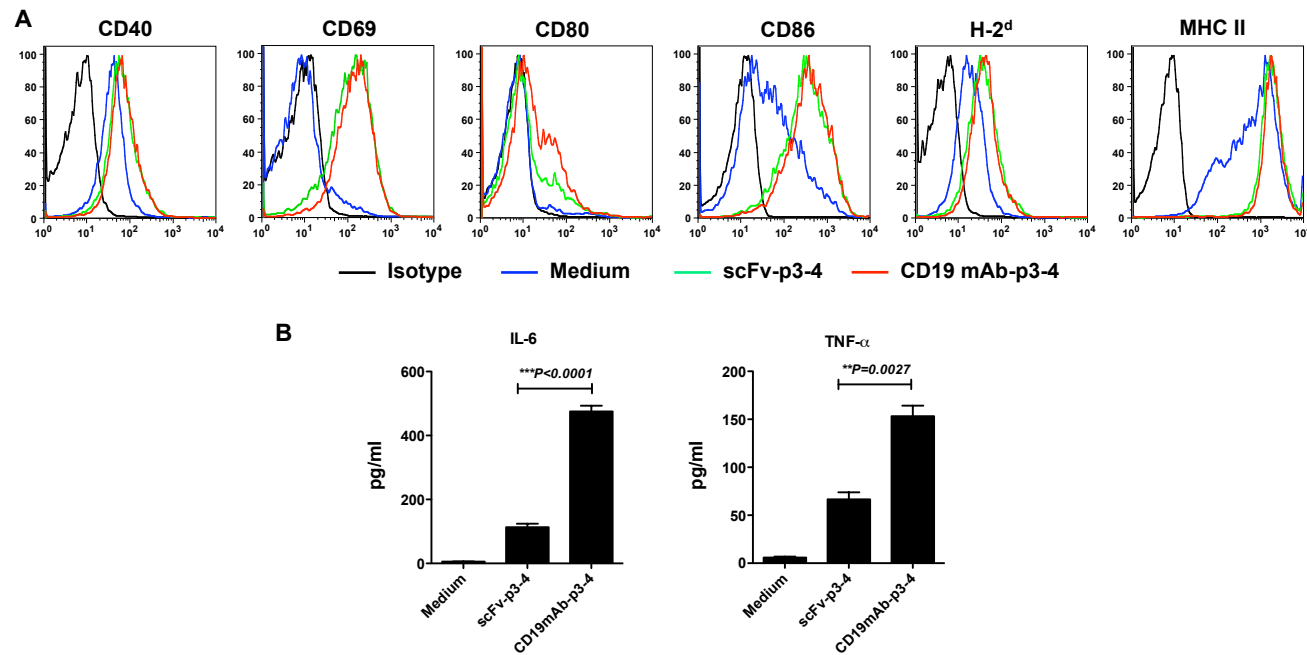

**Figure S1. B cell surface marker expression and cytokine secretion stimulated by whole CD19 mAb conjugated with P3-4 or CD19 scFv-p3-4.** (A) Purified B cells were stimulated with chemically conjugated whole CD19 mAb with P3-4 (CD19 mAb-p3-4) or CD19 scFv-p3-4 (scFv-p3-4) for 24 h and surface marker expression levels were assessed by flow cytometry. (B) IL-6 and TNF- $\alpha$  levels from 24 h B cell cultures under different conditions determined by ELISA.
