# Supplementary material
Source: PubMed Central journal article supplement (PMC3660458)
Supplement: NIHMS462065-supplement-2.pdf [file NIHMS462065-supplement-2.pdf]

**Table S1. Primer sequences**

|                    | Forward                             | Reverse                             |
|--------------------|-------------------------------------|-------------------------------------|
| Her-2 ECD domain 1 | AATGTCGACATGGAGCTGGCGG<br>CCTTGTG   | AATCTCGAGACAGGGGTGGCAG<br>GCCCCGAGA |
| Her-2 ECD domain 2 | AATGTCGACTCTCCGATGTGTAA<br>GGGCTCCC | AATCTCGAGTTGGTTGTGCAGGG<br>GGCAGAC  |
| Her-2 ECD domain 3 | AATGTCGACGAGGTGACAGCAG<br>AGGATGGA  | AATCTCGAGGTTCCGAAAGAGC<br>TGGTCCCA  |
| Her-2 ECD domain 4 | AATGTCGACCCGCACCAAGCTC<br>TGCTCCAC  | AATCTCGAGCGTCAGAGGGCTG<br>GCTCTCT   |
| OVA                | AGGTCGACAGCATGTTGGTGCT<br>GTTGC     | GACTCGAGAGGGGAAACACATC<br>TGCCA     |
